# Supplementary material for: The mutational profile and infiltration pattern of murine MLH1-/- tumors: concurrences, disparities and cell line establishment for functional analysis
Source: PubMed Central journal article supplement (PMC5288207; doi:10.18632/oncotarget.10677), 2016-07-18
Supplement: oncotarget-07-53583-s001.pdf [file oncotarget-07-53583-s001.pdf]

## The mutational profile and infiltration pattern of murine MLH1<sup>-/-</sup> tumors – concurrences, disparities and cell line establishment for functional analysis

### SUPPLEMENTARY TABLES

Supplementary Table S1: Mono- and dinucleotide repeats for detecting MSI in murine GIT and NHL.

| Name     | Repeat           | Product Size [bp] | Primer [5'>3']                                                 |
|----------|------------------|-------------------|----------------------------------------------------------------|
| AC096777 | T <sub>27</sub>  | 138               | F: 6-Fam-TACAGAGGATTGTCCTCTTGGAG<br>R: GCTGCTTCACTTGGACATTGGCT |
| L24372   | A <sub>27</sub>  | 90                | F: TAMRA-GGGAAGACTGCTTAGGGAAGA<br>R: ATTTGGCTTTCAAGCATCCATA    |
| Bat24    | A <sub>24</sub>  | 98                | F: 6-Fam-CATAGACCCAGTGCTCATCTTCGT<br>R: CATTCGGTGGAAAGCTCTGA   |
| Bat26    | A <sub>26</sub>  | 134               | F: 6-Fam-TCACCATCCATTGCACAGTT<br>R: CTGCGAGAAGGTACTCACCC       |
| Bat30    | A <sub>30</sub>  | 82                | F: Hex-ATTTGGCTTTCAAGCATCCATA<br>R: GGAAGACTGCTTAGGGAAGA       |
| Bat59    | A <sub>59</sub>  | 189               | F: Hex-GTAATCCCTTTATTCCATTTAGCA<br>R: GGCTCACAACCATCCGTAACAAGA |
| AA003063 | A <sub>23</sub>  | 87                | F: 6-FAM-ACGTCAAAAATCAATGTTAGG<br>R: CAGCAAGGGTCCCTGTCTTA      |
| U12235   | A <sub>24</sub>  | 86                | F: Hex-GCTCATCTTCGTTCCCTGTC<br>R: CATTCGGTGGAAAGCTCTGA         |
| D1Mit79  | CA <sub>31</sub> | 150               | F: TAMRA-GACCTGGAAGTTGGAAACCA<br>R: TGATCCAGAACCTCTGCCTT       |
| D15Mit93 | CA <sub>32</sub> | 144               | F: TAMRA-AAGAATTGGGGTGGGTAAGG<br>R: CATGTGCAGAATACTTACACATATGC |

Supplementary Table S2: Coding mononucleotide repeats for detecting MSI in murine MLH1<sup>-/-</sup> GIT and lymphomas and function of the resulting protein.

| Name                                         | Repeat         | Product Size [bp] | Primer [5'>3']                                        | Protein function                                                                                                               |
|----------------------------------------------|----------------|-------------------|-------------------------------------------------------|--------------------------------------------------------------------------------------------------------------------------------|
| APC                                          | A <sub>8</sub> | 189               | F: FAM-ATTTCTCTGGATCGCCTTT<br>R: GCGAATCTTTCCCGTAATCA | <i>Adenomatous Polyposis Coli</i> tumor suppressor, keeping cells from growing and dividing too fast or in an uncontrolled way |
| Tmem60 sequence conserved in human and mouse | A <sub>9</sub> | 164               | F: FAM-CTTTGACCCTCGACATGGAT<br>R: CAGCCAGTAAGGCCATAAA | <i>Transmembrane Protein 60</i> suspected to affect creatinine production and secretion                                        |

(Continued)

| Name                  | Repeat          | Product Size [bp] | Primer [5'>3']                                                  | Protein function                                                                                                                                                                                             |
|-----------------------|-----------------|-------------------|-----------------------------------------------------------------|--------------------------------------------------------------------------------------------------------------------------------------------------------------------------------------------------------------|
| Senp6                 | A <sub>11</sub> | 177               | F: HEX-GCTGTGACTGATTCGAGTGC<br>R: GCCATTCTCACTTTGGGTTTC         | <i>SUMO1/Sentrin Specific Peptidase 6</i><br>Protease, structurally related to ubiquitin                                                                                                                     |
| Phactr4               | A <sub>10</sub> | 185               | F: TAMRA-ATCTTCAAGCCGTGGAAATG<br>R: TTTAATGCAGCAGGCTCAG         | <i>Phosphatase And Actin Regulator 4</i><br>Interacts with actin and protein phosphatase 1, indirectly controlling cell cycle progression                                                                    |
| Mdm2                  | A <sub>8</sub>  | 198               | F: TAMRA-CGCAGGACAAAGACGAGAGT<br>R: TCATTTGGATTGGCTGTCTG        | <i>Proto-Oncogene, E3 Ubiquitin Protein Ligase</i><br>promotes tumor formation by targeting tumor suppressor proteins, such as p53, for proteasomal degradation                                              |
| Mdc1                  | C <sub>8</sub>  | 188               | F: HEX-GAAAGGCTGGTTGCTTCTTG<br>R: ACTGATGATCTCGCCCATCT          | <i>Mediator Of DNA-Damage Checkpoint 1</i><br>required to activate the intra-S phase and G2/M phase cell cycle checkpoints in response to DNA damage                                                         |
| Casc3 <sup>15</sup>   | C <sub>8</sub>  | 140               | F: TAMRA-TGTCACAC<br>TTCCATAGAAACACACC<br>R: GAGGACTCCCCAGCCGGT | <i>Cancer Susceptibility Candidate 3</i><br>core component of the exon junction complex deposited, functions in nonsense-mediated mRNA decay                                                                 |
| SDCCAG1 <sup>15</sup> | A <sub>11</sub> | 132               | F: FAM-GCATAGGCTGACAGGCTGAGAT<br>R: TGCCAGCATTGAGAACAGTGAT      | <i>Serologically Defined Colon Cancer Antigen 1</i><br>component of the ribosome quality control complex                                                                                                     |
| Rasal2 <sup>15</sup>  | A <sub>8</sub>  | 151               | F: FAM-CAAAGTGGCGACCAGTCACAC<br>R: TAGCCTTCCACCTCTTCATAGCA      | <i>RAS protein activator like 2</i><br>encodes a RasGAP-like protein containing the GAP-related domain                                                                                                       |
| Tcf7l2 <sup>15</sup>  | T <sub>8</sub>  | 119               | F: HEX-CACCTTGTATGTAGCGAACGCA<br>R: TCAACTTGCCGTGAGCATTAGA      | <i>Transcription Factor 7 like 2</i><br>high mobility group (HMG) box-containing transcription factor implicated in blood glucose homeostasis                                                                |
| Bend5                 | A <sub>8</sub>  | 113               | F: FAM-CTGGGGAACAGATGTTCTGA<br>R: CTCTGACGATGCTGAGCTTG          | <i>BEN domain containing 5</i><br>largely unknown                                                                                                                                                            |
| Nktr1                 | A <sub>9</sub>  | 95                | F: HEX-GCGAGACACTCTGATGGTCA<br>R: TGTCTTCTGCAATGTTTCTGC         | <i>Natural Killer Cell Triggering Receptor</i><br>membrane-anchored protein with a hydrophobic amino terminal domain and a cyclophilin-like PPIase domain; Component of a putative tumor-recognition complex |
| Rfc3 <sup>10</sup>    | A <sub>10</sub> | 165               | F: HEX-TTGGCAGTAGTGATTTGGTGA<br>R: AGGAGCAGTTTACCTGGGATT        | <i>Replication Factor C (Activator 1) 3</i><br>Binds PCNA (proliferating cell nuclear antigen) to increase the stability of DNA polymerases                                                                  |
| Supt16                | A <sub>8</sub>  | 85                | F: FAM-TGAGAAAGTTCGGCATAGCA<br>R: AGAAGGATCTGCCCCAGCTA          | <i>no information available</i>                                                                                                                                                                              |

(Continued)

| Name                 | Repeat         | Product Size [bp] | Primer [5'>3']                                                   | Protein function                                                                                                                                                                                               |
|----------------------|----------------|-------------------|------------------------------------------------------------------|----------------------------------------------------------------------------------------------------------------------------------------------------------------------------------------------------------------|
| C8a                  | T <sub>8</sub> | 100               | F: TAMRA-CCTGGCGGATACTTCAATCT<br>R: ACACCAGCTGAGTGGGACTT         | <i>Complement Component 8, Alpha Polypeptide</i><br>C8 participates in the formation of the membrane attack complex                                                                                            |
| Taf1b                | A <sub>8</sub> | 180               | F: FAM-CATGTGACAACCTTACGAA<br>GAATCA<br>R: TCCTTTCTTGGATCCTGAGC' | <i>TATA Box Binding Protein (TBP)-Associated Factor B, RNA Polymerase I</i><br>Component of RNA polymerase I core factor complex, plays a key role in multiple steps during transcription initiation           |
| Lig4                 | A <sub>9</sub> | 133               | F: FAM-TGAAGCCAAGGTGCTTACAG<br>R: TGGGTTATTAAGTGAAGAAGGCT        | <i>DNA Ligase IV</i><br>DNA repair enzyme, joins single-strand breaks in a double-stranded polydeoxynucleotide in an ATP-dependent reaction                                                                    |
| Ptpn21 <sup>10</sup> | A <sub>8</sub> | 176               | F: FAM-TTTGAAAGGTGTCTGGGTACG<br>R: CGCTCTGGTGGACACTTCTT          | <i>protein tyrosine phosphatase, non-receptor type 21</i><br>signaling molecule regulating a variety of cellular processes including cell growth, differentiation, mitotic cycle, and oncogenic transformation |

Supplementary Table S3A: Frameshift analysis of non-coding microsatellites in MLH1<sup>-/-</sup> GI-derived tumors.

| Sample               | ncMS         |              |              |              |              |              |              |              |              |             |
|----------------------|--------------|--------------|--------------|--------------|--------------|--------------|--------------|--------------|--------------|-------------|
|                      | Bat30        | Bat59        | Bat26        | Bat24        | AA003063     | U12235       | L24372       | AC096777     | D1Mit79      | D15Mit93    |
| # 1                  | -1           | -1           | -1           | wt           | wt           | wt           | wt           | -1           | wt           | wt          |
| # 2                  | -1           | -1           | -1           | -1           | -1           | wt/-1        | -1           | -1           | wt           | wt          |
| # 3                  | -1           | wt           | wt           | wt           | -1           | wt/-1        | wt           | wt           | wt           | wt          |
| # 4                  | -1           | -3           | -1           | -1           | -1           | wt           | -1           | -2           | -1           | -2          |
| # 5*                 | -1           | -2/-7        | wt           | wt           | wt           | wt/-1        | -2           | wt           | wt           | wt          |
| # 6                  | -1           | -3           | -1           | wt/-1        | -1           | -1           | -1           | -1           | wt           | wt          |
| # 7                  | -2/-4        | -2/-10       | -1/-5        | -2           | -1/-3        | -2           | -1/-5        | -2           | wt           | wt          |
| # 8                  | -2           | -2/-9        | -1           | -1           | -1           | wt           | -2           | -2           | -1           | wt          |
| # 9                  | -1           | -1/-3        | -1           | -1           | -1           | wt           | -1           | -1           | wt           | wt          |
| # 10                 | -2           | -8           | -2           | -2           | -2           | -2           | -3           | -3           | -1           | wt          |
| # 11 <sup>§</sup>    | -1           | -7           | -1           | -1           | -1           | wt           | -2           | -1           | wt           | wt          |
| # 11 <sup>+</sup>    | -2           | -9           | -3           | -1           | -1           | wt           | -2           | -3           | wt           | wt          |
| # 12                 | -3           | -8           | -2           | -2           | del          | del          | del          | -5           | wt           | wt          |
| # 13                 | wt           | -5           | -2           | -1/-3        | -1           | -2           | -1           | -3           | +1           | wt          |
| # 14                 | -3           | MSI          | -2/-7        | MSI          | -2           | MSI          | -5           | -5           | wt           | wt          |
| # 15                 | -2           | MSI          | -2           | -1           | -2           | -2           | -2           | -1/-5        | -1           | wt          |
| # 16                 | -6           | MSI          | -4           | -1/-6        | -2/-5        | MSI          | -1/-7        | -5           | wt           | wt          |
| # 17                 | -2           | MSI          | -1           | -1           | -1           | MSI          | -2           | -2           | wt           | wt          |
| # 18                 | wt           | MSI          | wt           | -1           | -1           | MSI          | -1           | -1           | -1           | wt          |
| # 19                 | -3           | MSI          | -3           | -1           | -1           | MSI          | -3           | -2           | -1           | wt          |
| # 20                 | -1           | -2           | -2           | -1           | -1           | wt/-1        | -1           | -3           | -1           | wt          |
| <b>frequency [n]</b> | <b>20/21</b> | <b>20/21</b> | <b>18/21</b> | <b>18/21</b> | <b>19/21</b> | <b>15/21</b> | <b>19/21</b> | <b>19/21</b> | <b>8/21</b>  | <b>1/21</b> |
| <b>frequency [%]</b> | <b>95.24</b> | <b>95.24</b> | <b>85.71</b> | <b>85.71</b> | <b>90.48</b> | <b>71.43</b> | <b>90.48</b> | <b>90.48</b> | <b>38.10</b> | <b>4.76</b> |

\* – adenoma; § – duodenal; + – colonic; wt – wildtype; - – deletions; + – insertions; MSI – microsatellite instable (not quantitatively analyzable)

Supplementary Table S3B: Frameshift analysis of non-coding microsatellites in MLH1<sup>-/-</sup> derived NHL.

| Sample        | ncMS  |        |        |       |          |        |        |          |         |          |
|---------------|-------|--------|--------|-------|----------|--------|--------|----------|---------|----------|
|               | Bat30 | Bat59  | Bat26  | Bat24 | AA003063 | U12235 | L24372 | AC096777 | D1Mit79 | D15Mit93 |
| #1 (duodenal) | -2    | -5     | -1     | -3    | wt       | wt     | -1     | -1       | wt      | wt       |
| #2 (duodenal) | wt    | -4     | -1     | wt/-8 | -1       | wt     | wt/-7  | wt/-6    | -1      | wt       |
| #3 (thymus)   | -2    | -3     | -1     | -1    | -1       | -1     | -1     | -2       | wt      | wt       |
| #3 (spleen)   | -1    | -2     | -1     | -1    | -1       | -1     | -1     | -1       | wt      | wt       |
| #3 (kidney)   | -1    | -2     | -3     | -1    | -1       | wt/-1  | -1     | -1       | wt      | wt       |
| #3 (liver)    | -1    | -2     | -1     | -2    | -1       | 1      | -1     | -1       | wt      | wt       |
| #4 (thymus)   | -2    | -8     | -2     | -2    | -1       | -2     | -2     | -3       | wt      | wt/+2    |
| #4 (spleen)   | -1    | -8     | -1     | -2    | -1       | +1     | -2     | -2       | wt      | wt/+2    |
| #4 (liver)    | -1    | -8     | -1     | -2    | MSI      | MSI    | MSI    | -6       | wt      | +2       |
| #5 (spleen)   | -1    | -5     | -1     | -2    | -2       | -2     | -2     | -2       | -5      | +2       |
| #6 (liver)    | -2    | -5     | -2     | -1    | -1/-2    | -1     | -3     | -4       | wt      | wt       |
| #7 (spleen)   | -2    | -5     | -2     | -1    | -2       | -1     | -3     | -4       | wt      | wt       |
| #8 (spleen)   | -2    | -12    | -1     | -3    | -2       | wt     | -2     | -3       | wt      | wt       |
| #9 (kidney)   | -3    | -14    | -3     | -2    | -1       | -3     | -3     | -1       | -1      | wt       |
| #10 (spleen)  | -2    | -7     | -3     | wt    | -1       | wt     | -3     | -2       | +1      | wt       |
| #10 (liver)   | -2    | -7     | -3     | wt    | -1       | wt     | -3     | -2       | +1      | wt       |
| #10 (skin)    | -1    | -6     | -3     | wt    | del      | wt     | del    | del      | +1      | wt       |
| #11 (thymus)  | -3    | -7     | -2     | -2    | -1       | -3     | -3     | -1       | wt      | wt       |
| #11 (spleen)  | -2    | -6     | -2     | -2    | -1       | -3     | -3     | -1       | wt      | wt       |
| #11 (liver)   | -2    | -5     | -3     | -2    | -1       | -3     | -3     | -1       | wt/-2   | wt       |
| frequency [n] | 19/20 | 20/20  | 20/20  | 17/20 | 19/20    | 14/20  | 20/20  | 20/20    | 7/20    | 4/20     |
| frequency [%] | 95.00 | 100.00 | 100.00 | 85.00 | 95.00    | 70.00  | 100.00 | 100.00   | 35.00   | 20.00    |

wt – wildtype; - - deletions; + - insertions; MSI – microsatellite instable (not quantitatively analyzable)

**Supplementary Table S4: IC<sub>50</sub> values of antitumor drugs evaluated for MLH1<sup>-/-</sup> A7450 cells in comparison with MMR-proficient control cells.**

| drug                          | IC <sub>50</sub> value    |                      |                   |
|-------------------------------|---------------------------|----------------------|-------------------|
|                               | MLH1 <sup>-/-</sup> A7450 | CT26                 | Colon-26          |
| 5-FU                          | 280 ng/mL                 | 10 ng/mL             | 80 ng/mL          |
| Gemcitabine                   | 0.015 µg/mL               | 1 µg/mL              | 1.2 µg/mL         |
| Oxaliplatin                   | 0.8 µg/mL                 | 4 µg/mL              | 4 µg/mL           |
| Cisplatin                     | 2 µg/mL                   | 2.8 µg/mL            | 0.25 µg/mL        |
| Irinotecan                    | 32 µM                     | 100 µM               | 35 µM             |
| Pemetrexed                    | 100 µM                    | 0.1 µM               | 32 nM             |
| Sorafenib                     | 7.5 µM                    | 2.5 µM               | <1 µM             |
| FOLFOX                        | additive effects*         | synergistic effects* | additive effects* |
| FOLFIRI                       | additive effects*         | additive effects*    | additive effects* |
| N-Nitroso-N-ethylurea         | >500 µM                   | 10 µM                | 10 µM             |
| O <sup>6</sup> -Benzylguanine | >250 µM                   | 5 µM                 | 8.9 µM            |

\*compared to monotherapy
